# Supplementary material
Source: MDPI journal article supplement (https://www.mdpi.com/1424-8247/17/5/549)

## Supporting Information

### **Structure–Activity Relationship of Synthetic Linear KTS-Peptides Containing Meta-Aminobenzoic Acid as Antagonists of $\alpha 1\beta 1$ Integrin with Anti-Angiogenic and Melanoma Anti-Tumor Activities**

*Majdi Saleem Naamneh*<sup>1</sup>, *Tatjana Momic*<sup>1,2</sup>, *Michal Klazas*<sup>1</sup>, *Julius Grosche*<sup>3</sup>, *Johannes A. Eble*<sup>3</sup>,  
*Cezary Marcinkiewicz*<sup>4</sup>, *Netaly Khazanov*<sup>5</sup>, *Hanoch Senderowitz*<sup>5</sup>, *Amnon Hoffman*<sup>1</sup>,  
*Chaim Gilon*<sup>6</sup>, *Jehoshua Katzhendler*<sup>1</sup> and *Philip Lazarovici*<sup>1,\*</sup>

- 1 School of Pharmacy Institute for Drug Research, Faculty of Medicine, The Hebrew University of Jerusalem, Jerusalem 9112002, Israel
- 2 VINČA Institute of Nuclear Sciences, National Institute of the Republic of Serbia, University of Belgrade, Mike Petrovića Alasa 12–14, 11000 Belgrade, Serbia
- 3 Institute of Physiological Chemistry and Pathobiochemistry, University of Münster, Waldeyer-Str. 15, 48149 Münster, Germany
- 4 Debina Diagnostics Inc., 33 Bishop Hollow Rd., Newtown Square, PA 19073-3211, USA
- 5 Department of Chemistry, Bar Ilan University, Ramat-Gan 5290002, Israel
- 6 Institute of Chemistry, The Hebrew University of Jerusalem, Jerusalem 9190401, Israel
- \* Correspondence: philipl@ekmd.huji.ac.il

## Table of Contents:

|                                                                                                                                              |            |
|----------------------------------------------------------------------------------------------------------------------------------------------|------------|
| 1. Table S1—Peptides' sequence, molecular weight and purity of synthetic KTS-peptides containing meta-aminobenzoic acid                      | page S1    |
| 2. Figures S1–S8 of HPLC and MS spectra of MABA peptides 1–8                                                                                 | page S2–S9 |
| 3. Figure S9—Protocol of synthesis of peptide 7                                                                                              | page S10   |
| 4. Table S2—Selectivity of the inhibitory effects of MABA-peptide 4 compared to Viperistatin on various integrins in cell adhesion assay     | page S11   |
| 5. Figure S10—Phase contrast images taken 6 h of the treated HUVECs on Matrigel to measure tube formation after treatment with MABA-peptides | page S12   |
| 6. Table S3—Median survival of groups of B16 melanoma mice treated with peptides in comparison to control group of sick mice                 | page S13   |
| 7. Figure S11—RMSD plots for compound 2 and 4 from the Molecular Dynamic simulation                                                          | page S14   |
| 8. Figure S12—The central structures of the biggest cluster after Molecular Dynamic simulations of compounds 2 and 4                         | page S14   |

**Table S1.** Peptides' sequence, molecular weight and purity of synthetic KTS-peptides containing meta-aminobenzoic acid

| Peptide Number | Sequence                                                                            | M <sub>w</sub> calcd <sup>1</sup> | M <sub>w</sub> obs <sup>2</sup> | Purity <sup>3</sup> % |
|----------------|-------------------------------------------------------------------------------------|-----------------------------------|---------------------------------|-----------------------|
| 1              | H <sub>2</sub> N-W-KTS-R-TSHY- <b>MABA</b> -TGKSDG-COOH                             | 1830                              | 1829.87                         | 95.51                 |
| 2              | H <sub>2</sub> N-W-KTS- <b>MABA</b> -R-TSHYGKSDG-COOH                               | 1729                              | 1728.77                         | 95.04                 |
| 3              | H <sub>2</sub> N-KTS-W-KTS- <b>MABA</b> -R-TSHYGKSDG-COOH                           | 2045                              | 2045.12                         | 97.60                 |
| 4              | H <sub>2</sub> N-W-KTS- <b>MABA</b> -R- <b>MABA</b> -TSHYGKSDG-COOH                 | 1848                              | 1847.84                         | 96.37                 |
| 5              | H <sub>2</sub> N-W-KTS- <b>MABA</b> -R-TSHY- <b>MABA</b> -TGKSDG-COOH               | 1948                              | 1948.94                         | 97.56                 |
| 6              | H <sub>2</sub> N-W-KTR- <b>MABA</b> -R- <b>MABA</b> -TSHYTGKSDG-COOH                | 2017                              | 2018.05                         | 95.88                 |
| 7              | H <sub>2</sub> N-W-KTR- <b>MABA</b> -R- <b>MABA</b> -TSHY- <b>MABA</b> -TGKSDG-COOH | 2136                              | 2137.12                         | 95.10                 |
| 8              | H <sub>2</sub> N-W-KTS-R-TSHY-TGKSDG-COOH                                           | 1710                              | 1710.80                         | 96.68                 |

1. Calculated from theoretical sequence, amino acids in capital letters.
2. Based on exact mass calculation for [M+H]<sup>+</sup>.
3. According to HPLC data.

Figure S1-Peptide 1

HPLC

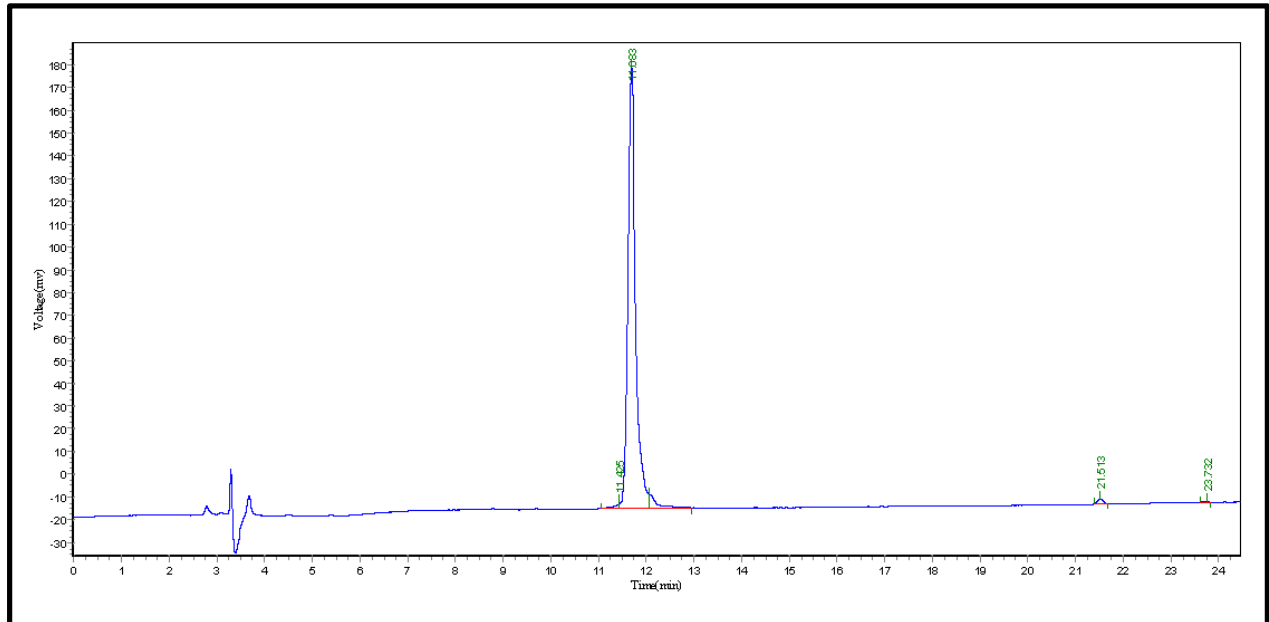

MS spectrum

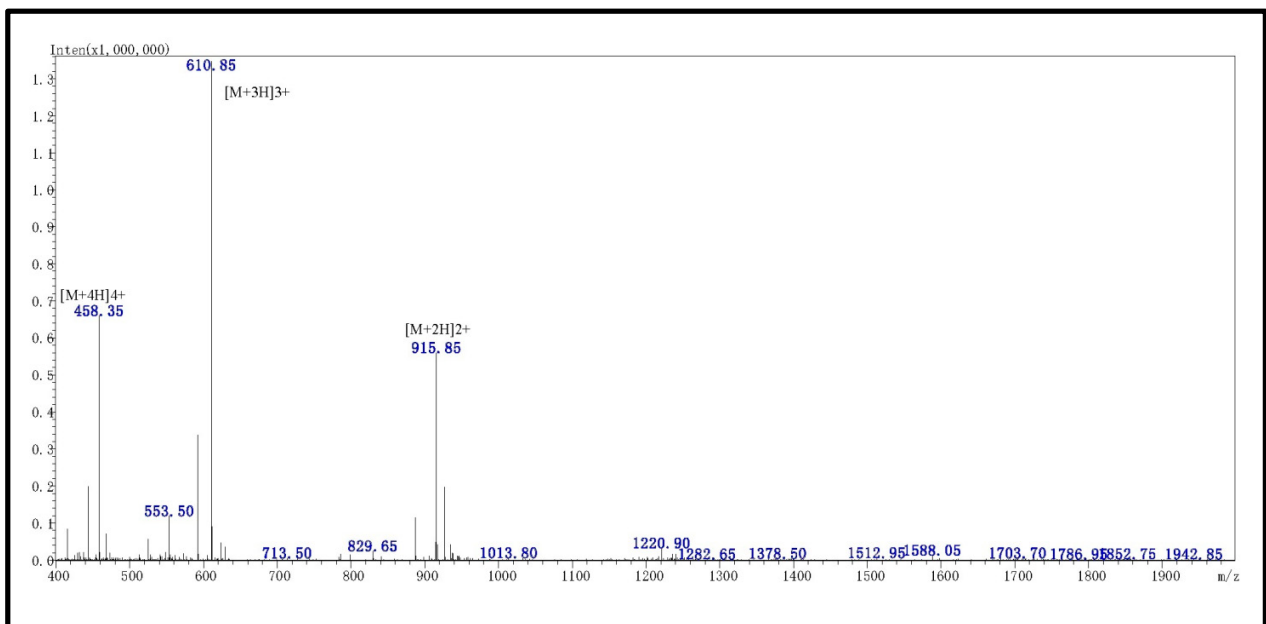

**Figure S2-Peptide 2**

HPLC

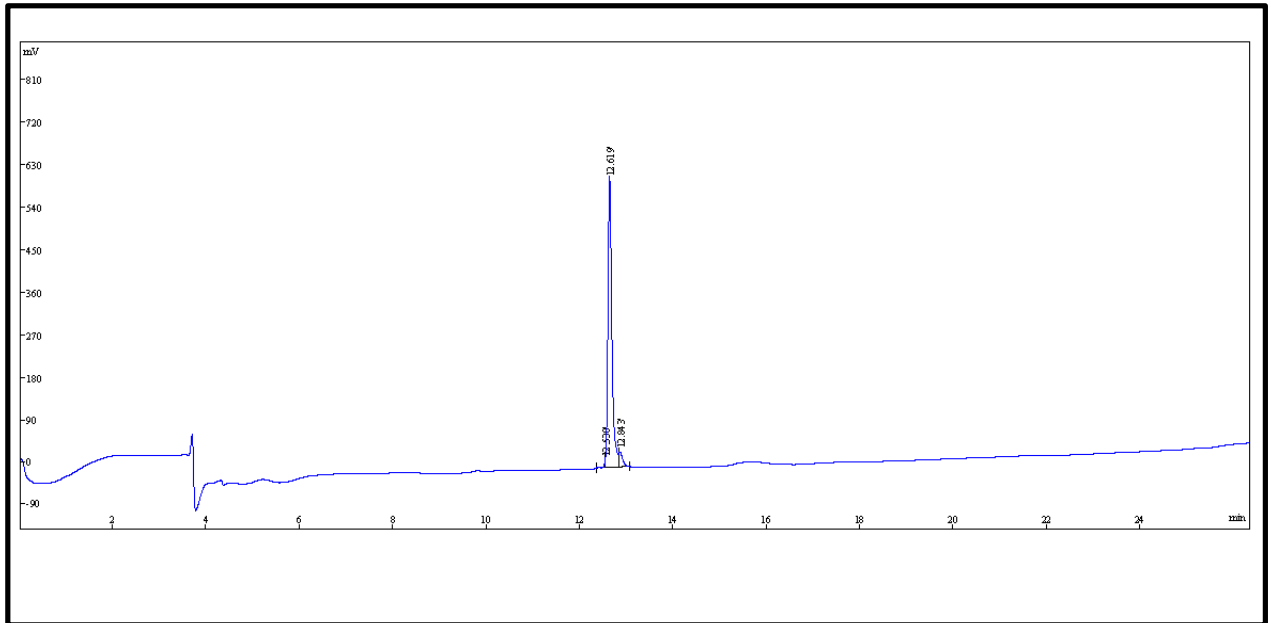

MS spectrum

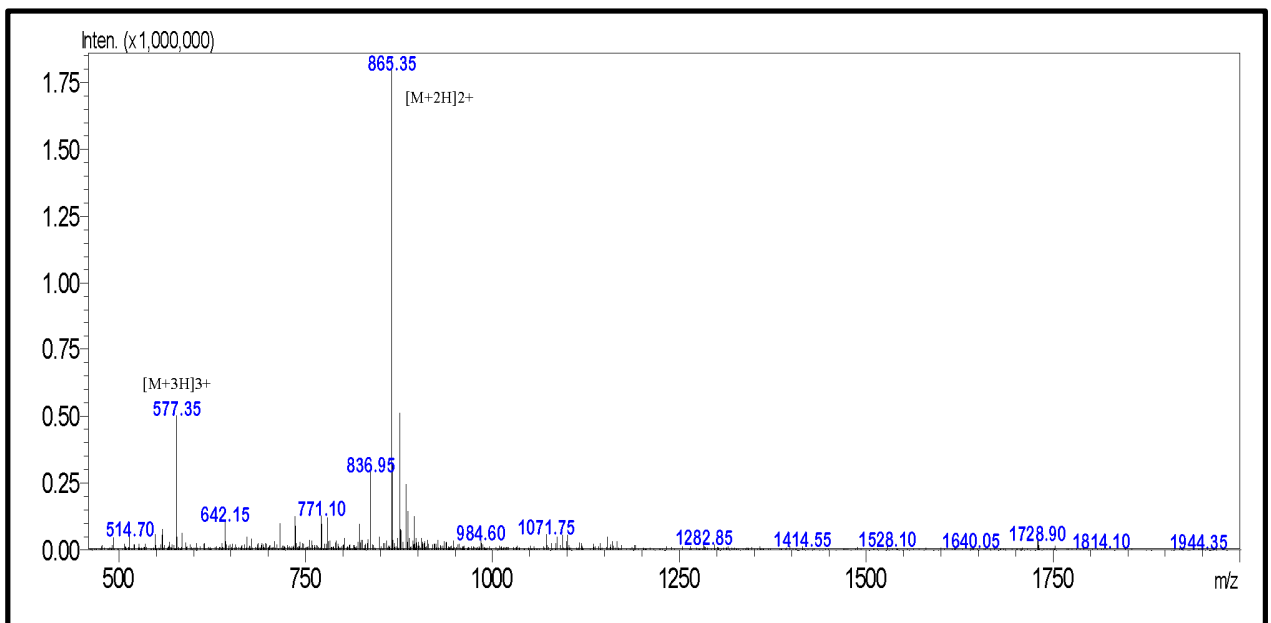

Figure S3-Peptide 3

HPLC

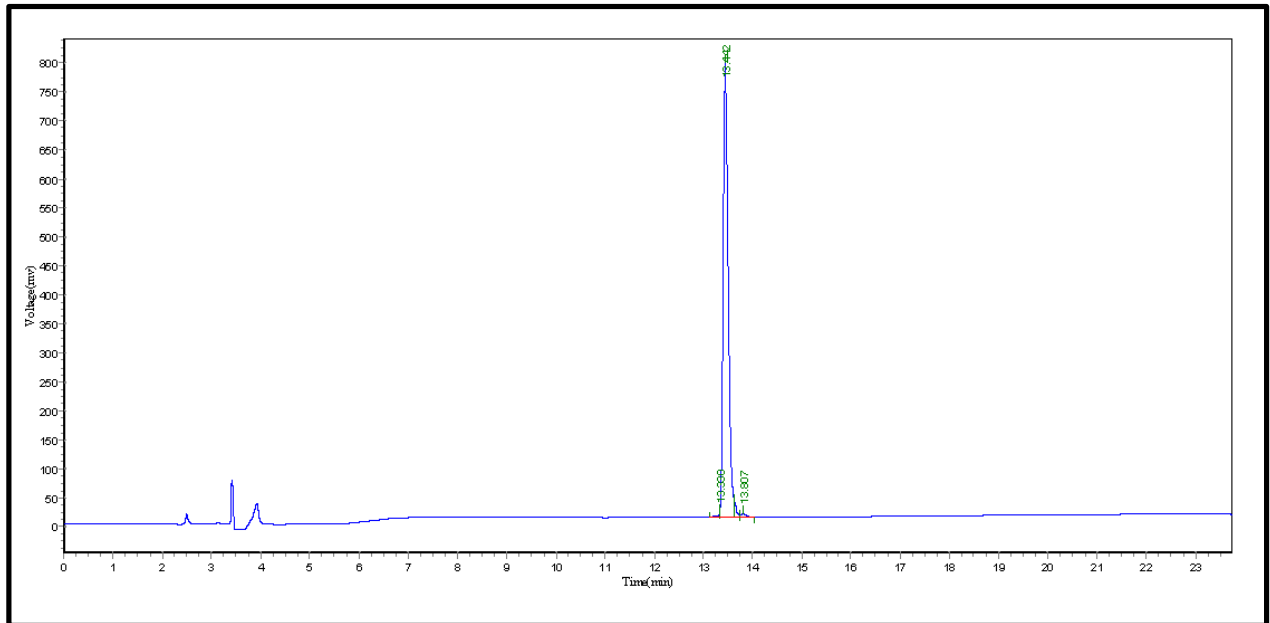

MS spectrum

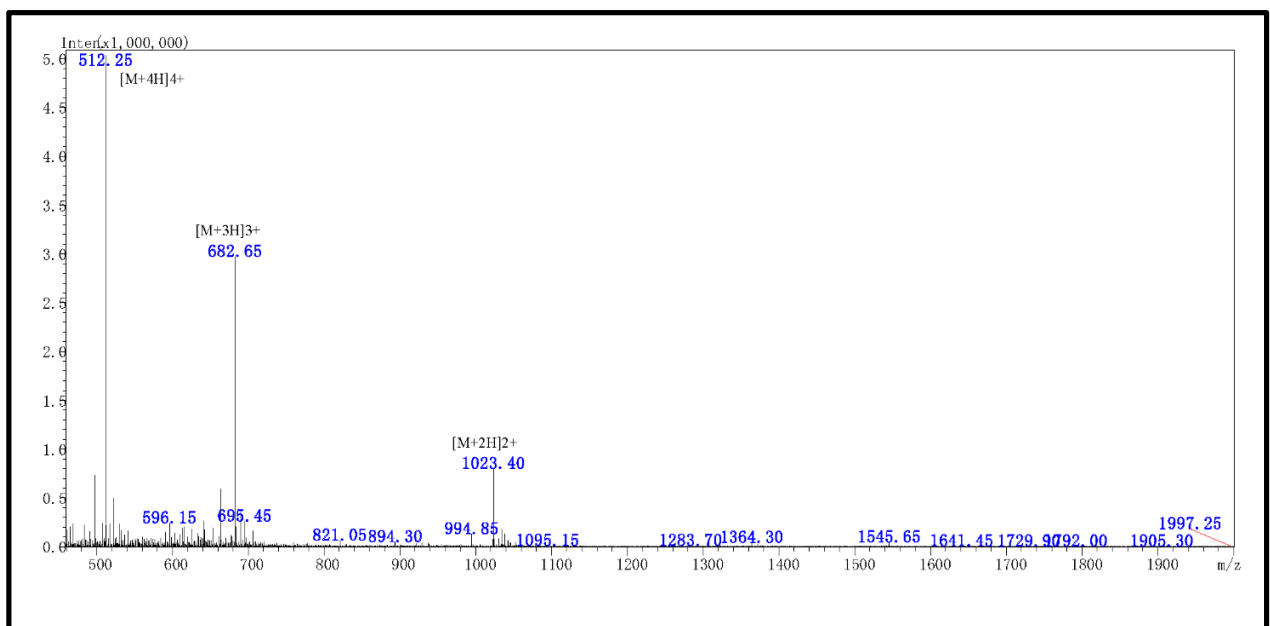

Figure S4-Peptide 4

HPLC

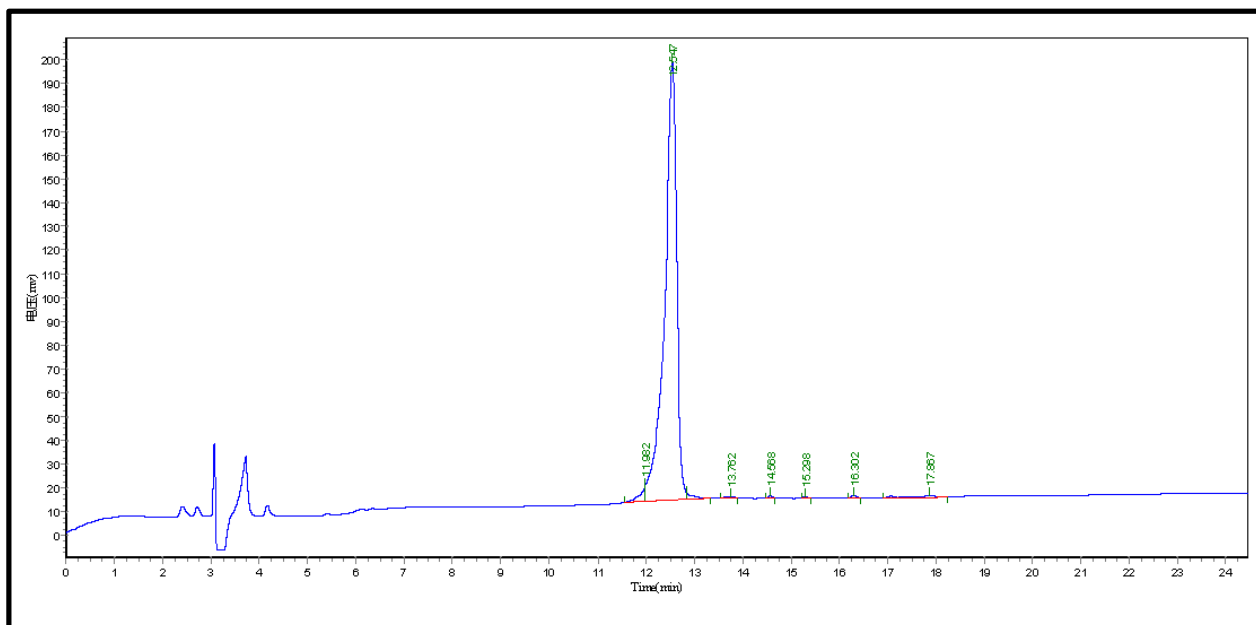

MS spectrum

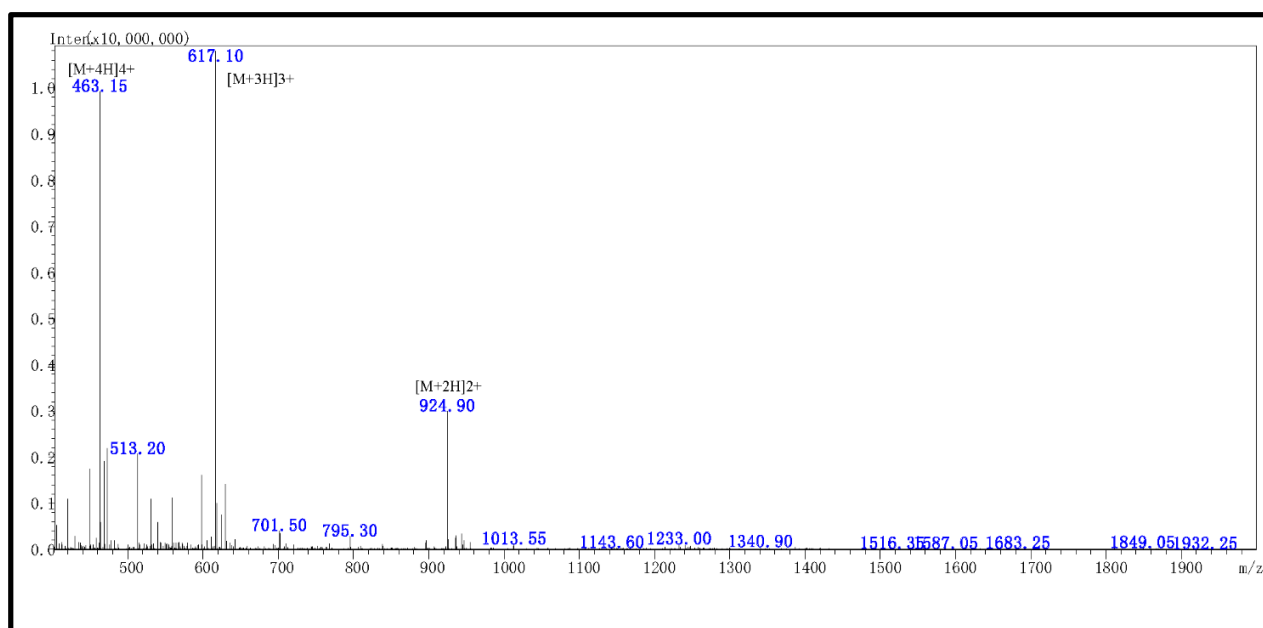

Figure S5-Peptide 5

HPLC

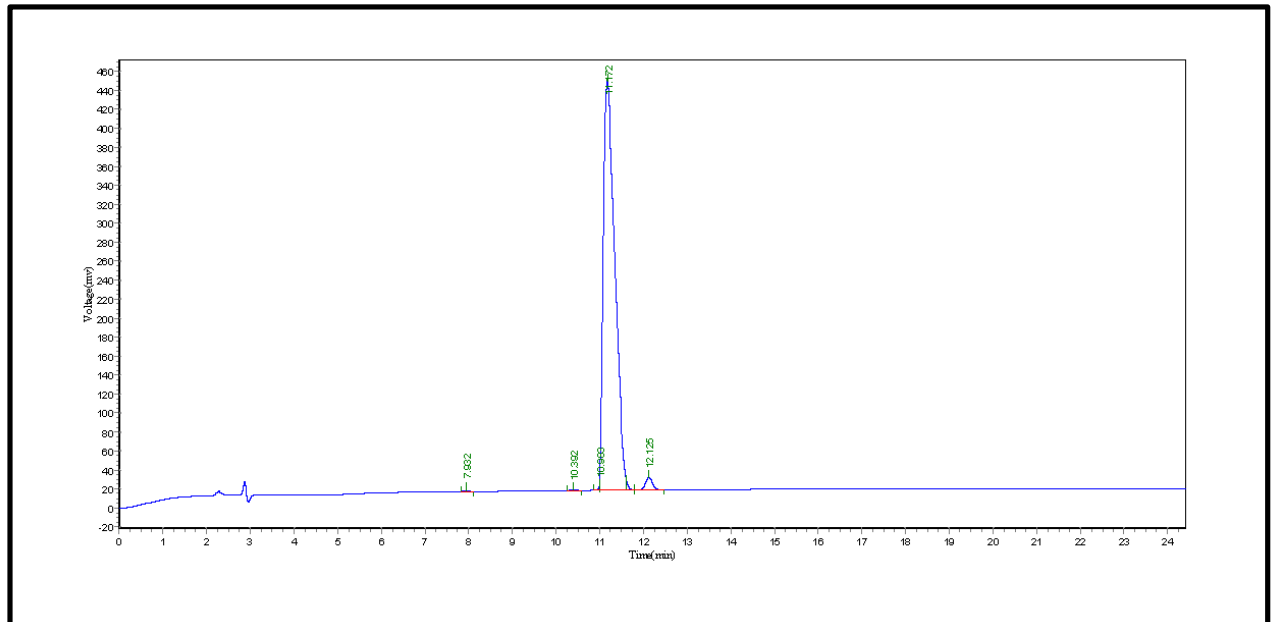

MS spectrum

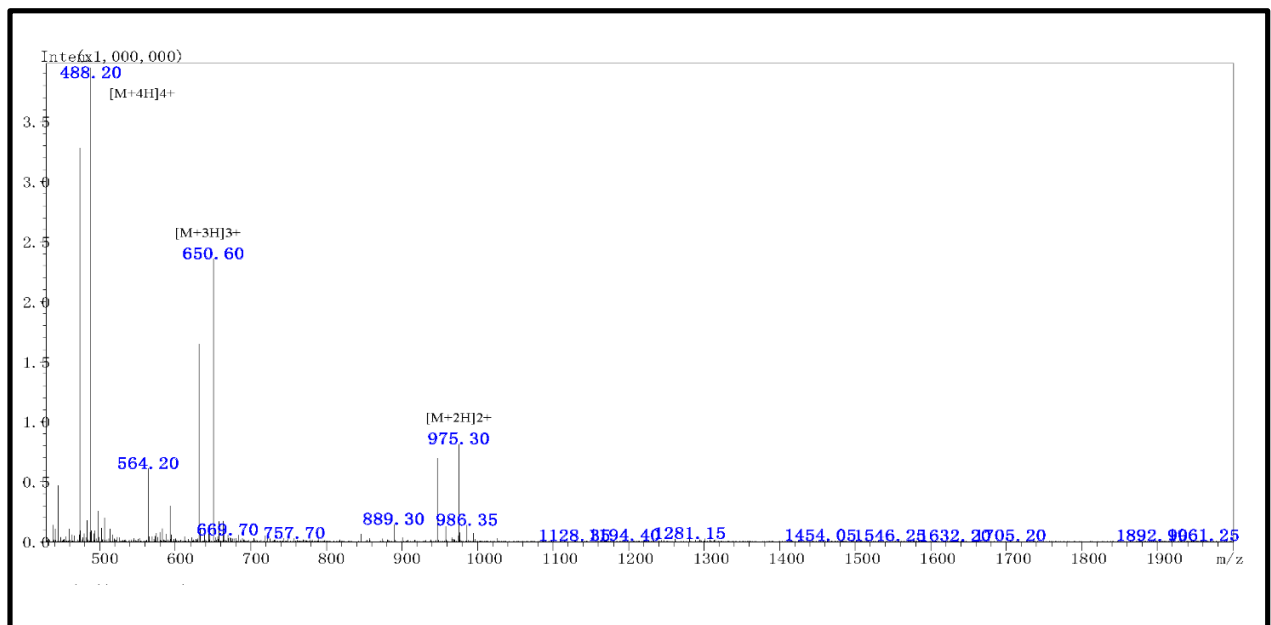

**Figure S6-Peptide 6**

HPLC

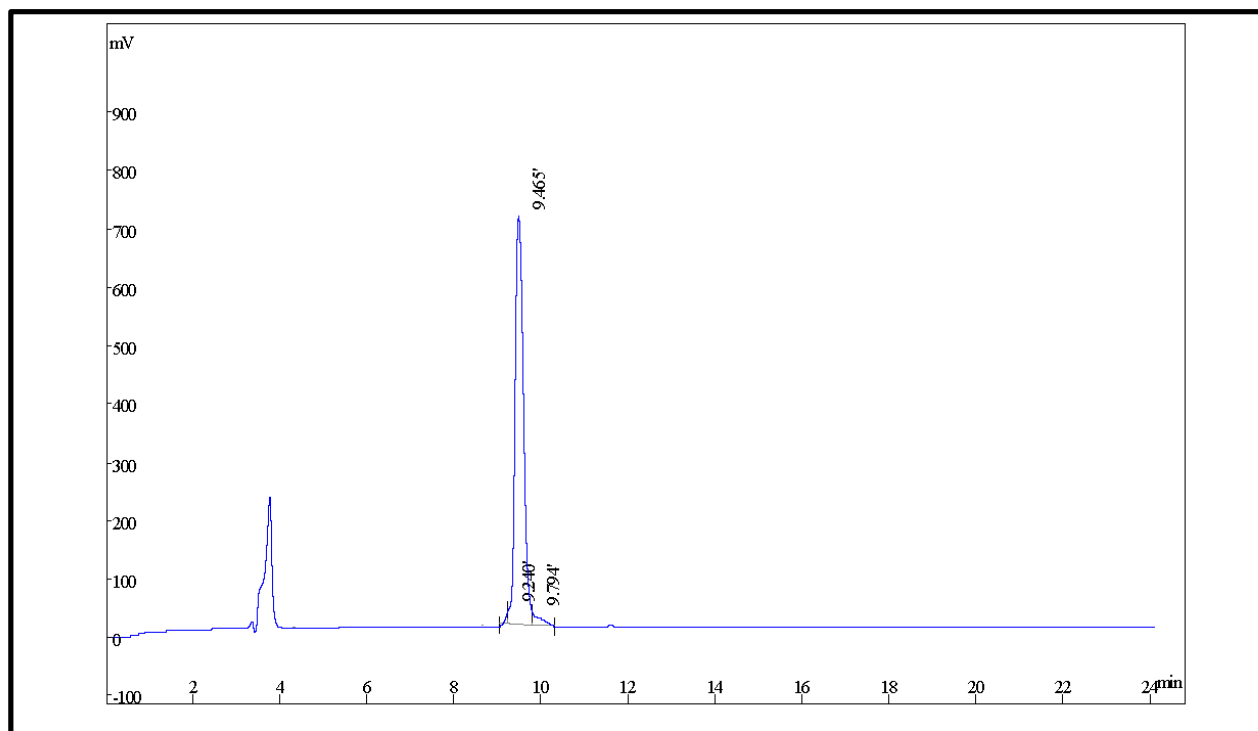

MS spectrum

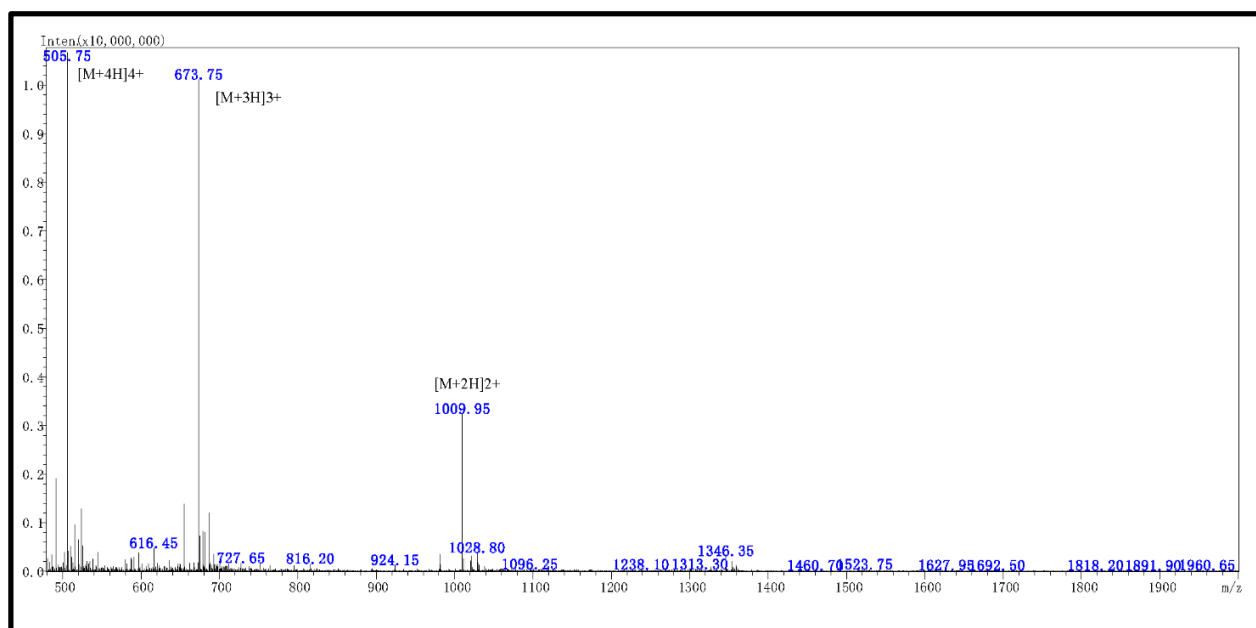

Figure S7-Peptide 7

HPLC

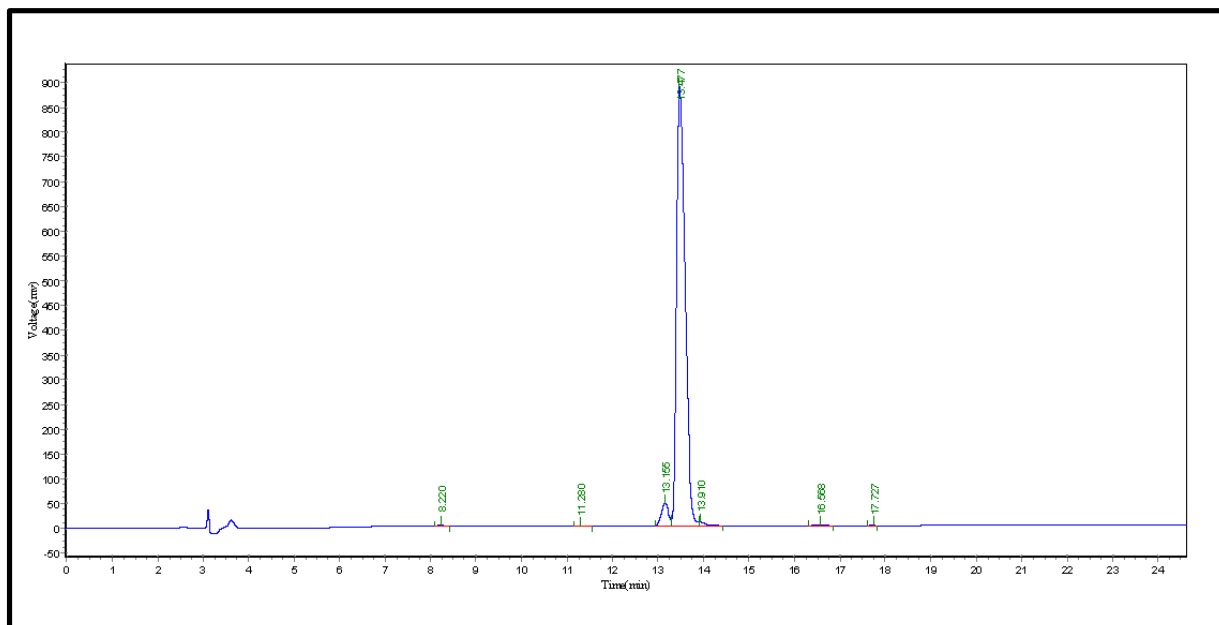

MS spectrum

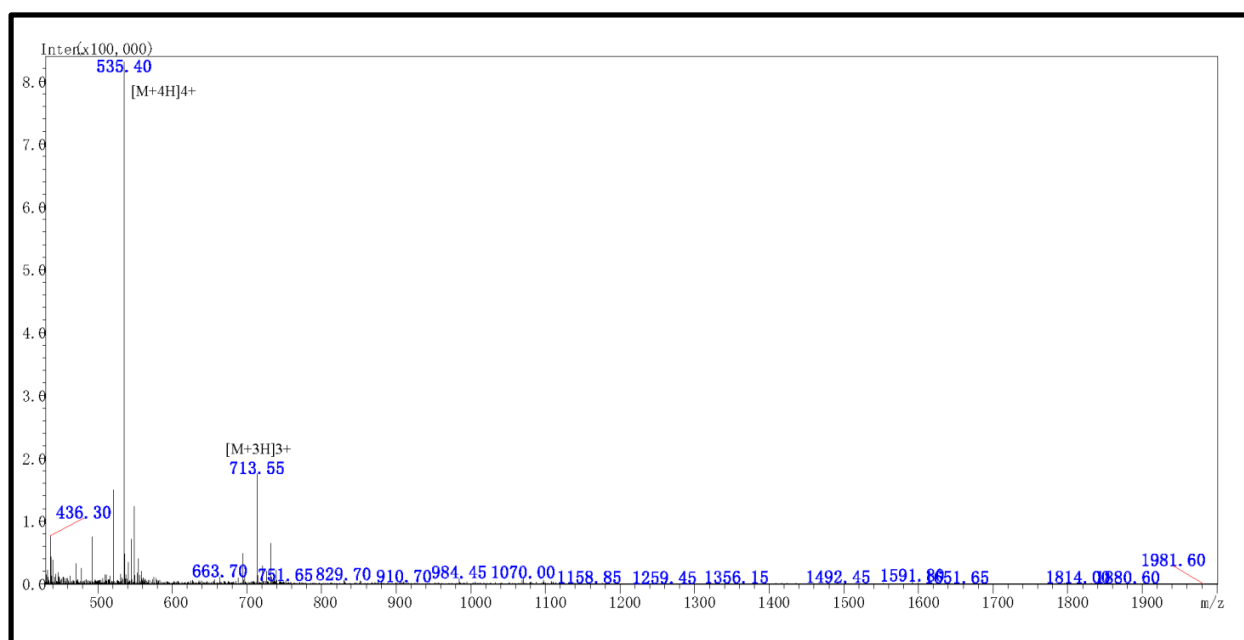

**Figure S8-Peptide 8**

HPLC

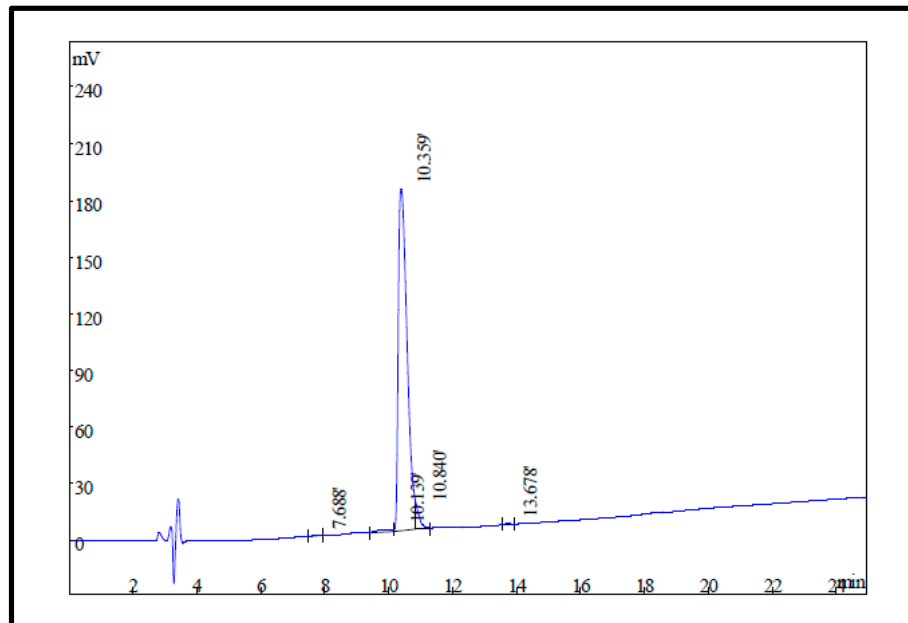

MS spectrum

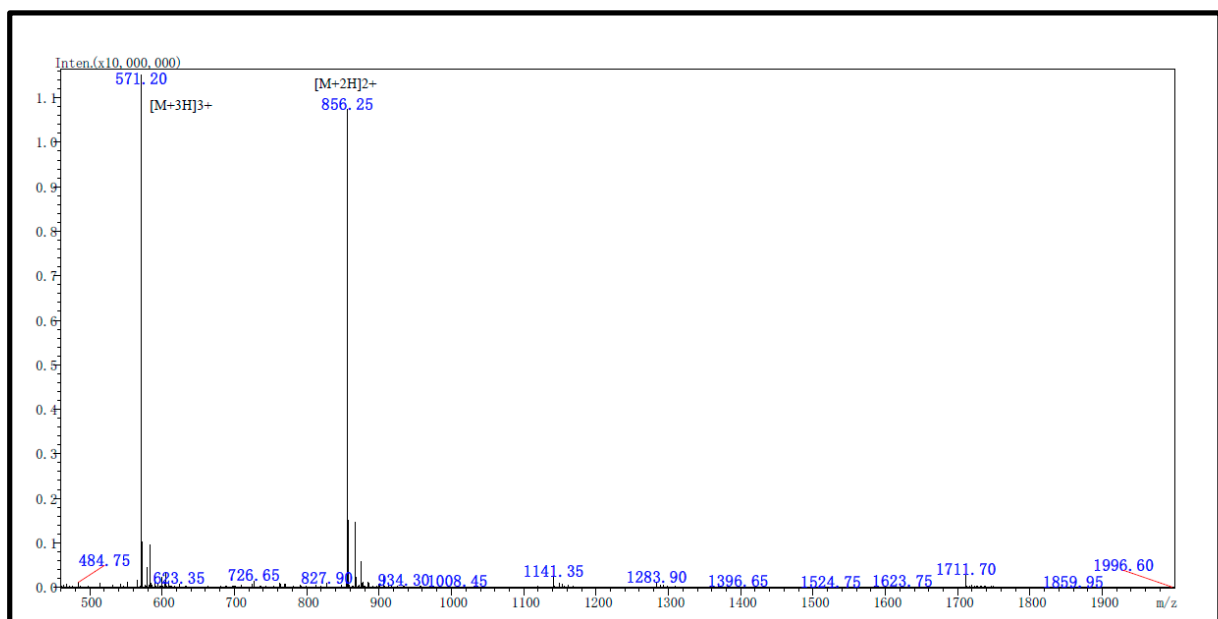

**Figure S9-** Protocol of synthesis of peptide 7

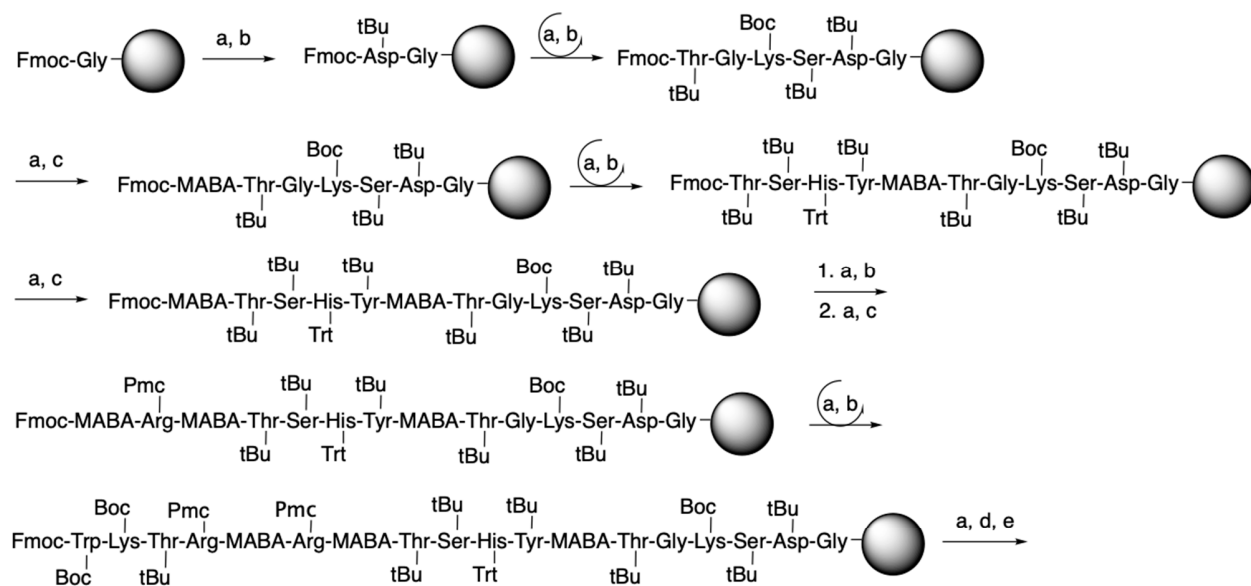

H-Trp-Lys-Thr-Arg-MABA-Arg-MABA-Thr-Ser-His-Tyr-MABA-Thr-Gly-Lys-Ser-Asp-Gly-OH

**Legend**

- a. Fmoc deprotection: piperidine/DMF 20%; washing: DMFX3
- b. coupling: FmocAa+TBTU/DIEA/DMF; washing: DMFX3
- c. coupling: FmocMABA+TBTU/DIEA/DMF
- d. final wash: DMFX3, DCMX3, MeOHX3, oven 3h.
- e. peptide deprotection: TFA/phenol/H<sub>2</sub>O/TIS (88:5:5:2 (v/v/v/v))

(a, b) = peptide elongation

**Table S2.** Selectivity of the inhibitory effects of MABA-peptide 4 compared to Viperistatin on various integrins in cell adhesion assay.

| Cell Type  | Integrin | Ligand      | MABA-peptide 4<br>IC <sub>50</sub> (μM) | Viperistatin<br>IC <sub>50</sub> (nM) |
|------------|----------|-------------|-----------------------------------------|---------------------------------------|
| α1K562     | α1β1     | Collagen IV | 550                                     | 0.3                                   |
| α2K562     | α2β1     | Collagen I  | 3,000                                   | >10,000                               |
| α6K562     | α6β1     | Laminin     | >10,000                                 | >10,000                               |
| K562       | α5β1     | Fibronectin | >5,000                                  | >5,000                                |
| Jurkat     | α4β1     | VCAM-1      | >5,000                                  | >10,000                               |
| SW480α9    | α9β1     | VCAM-1      | >10,000                                 | >10,000                               |
| Platelets  | αIIbb3   | Fibrinogen  | >10,000                                 | >10,000                               |
| JY-B cells | αvb3     | Vitronectin | >10,000                                 | >10,000                               |

Peptides binding activity was evaluated for anti-adhesion effect using cell lines expressing different major integrin subunits. Before the day of the experiment, each well of a 96-well plate was coated with 1 μg/ 0.1 ml ligands. Cells were labeled with the fluorescent tag CMFDA. Labeled cells ( $1 \times 10^5$  cells/well) were added to each well in the absence or presence of inhibitor and incubated at 37°C for 60 min. Unbound cells were removed by washing the wells three times and bound cells were lysed by the addition of 0.5% Triton X-100 and the amount of fluorescence was quantified, at  $\lambda_{ex} = 485$  nm and  $\lambda_{em} = 530$  nm. To determine the number of adhered cells from the fluorescence values, a standard curve was generated by serial dilutions of known numbers of CMFDA-labeled cells. The data represent means of the results of three experiments. VCAM-1, vascular cell adhesion molecule-1; α1, α2, α6 K562, K562 cells transfected with α1, α2 or α6 integrins; SW480α9 = SW480 cells transfected with α9 integrin;

**Figure S10-** Phase contrast images taken 6 h of the treated HUVECs on Matrigel to measure tube formation after treatment with MABA-peptides.

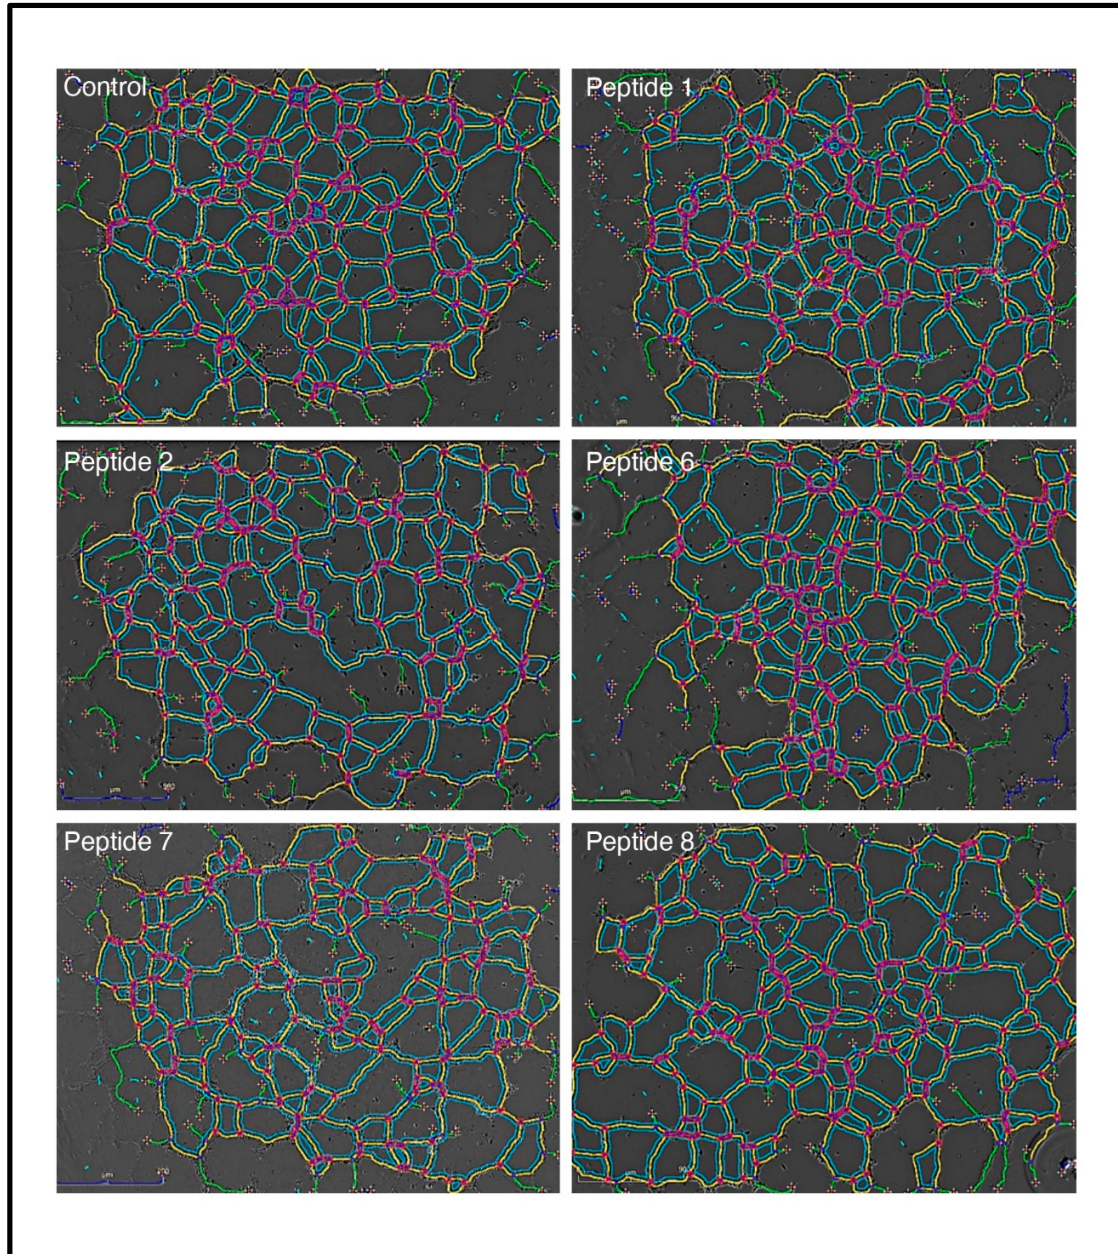

**Table S3.** Median survival of groups of B16 melanoma mice treated with peptides in comparison to control group of sick mice.

| <b>Group (n=10)</b>                              | <b>1</b>                   | <b>2</b>                      | <b>3</b>         | <b>4</b>         | <b>5</b>         | <b>6</b>         |
|--------------------------------------------------|----------------------------|-------------------------------|------------------|------------------|------------------|------------------|
| <b>Treatment</b>                                 | <b>Control Sick-saline</b> | <b>Control sick-untreated</b> | <b>Peptide 3</b> | <b>Peptide 4</b> | <b>Peptide 5</b> | <b>Peptide 6</b> |
| Median survival                                  | 32                         | 35.5                          | 50               | 73               | 35               | 38               |
| <b>Log-rank (Mantel-Cox) test</b>                |                            |                               |                  |                  |                  |                  |
| Chi square                                       | 0.1699                     | 1.745                         | 0.4813           | 15.48            | 1.123            | 0.5095           |
| df                                               | 1                          | 1                             | 1                | 1                | 1                | 1                |
| P value                                          | 0.6802                     | 0.1865                        | 0.4878           | ≤0.0001          | 0.2894           | 0.4753           |
| P value summary                                  | ns                         | ns                            | ns               | ***              | ns               | ns               |
| Are the survival curves significantly different? | No                         | No                            | No               | Yes              | No               | No               |
| <b>Log-rank test for trend</b>                   |                            |                               |                  |                  |                  |                  |
| Chi square                                       | 0.9317                     | 1.161                         | 0.03682          | 13.54            | 1.049            | 0.3005           |
| df                                               | 1                          | 1                             | 1                | 1                | 1                | 1                |
| P value                                          | 0.3344                     | 0.2812                        | 0.8478           | 0.0002           | 0.3058           | 0.5836           |
| P value summary                                  | ns                         | ns                            | ns               | ***              | ns               | ns               |
| Significance trend                               | No                         | No                            | No               | Yes              | No               | No               |
| Log-rank (Mantel-Cox) test                       | 0.1699                     | 1.745                         | 0.4813           | 15.48            | 1.123            | 0.5095           |

\*\*\*  $p < 0.001$

**Figure S11-** RMSD plots for compound 2 and 4 from the Molecular Dynamic simulation.

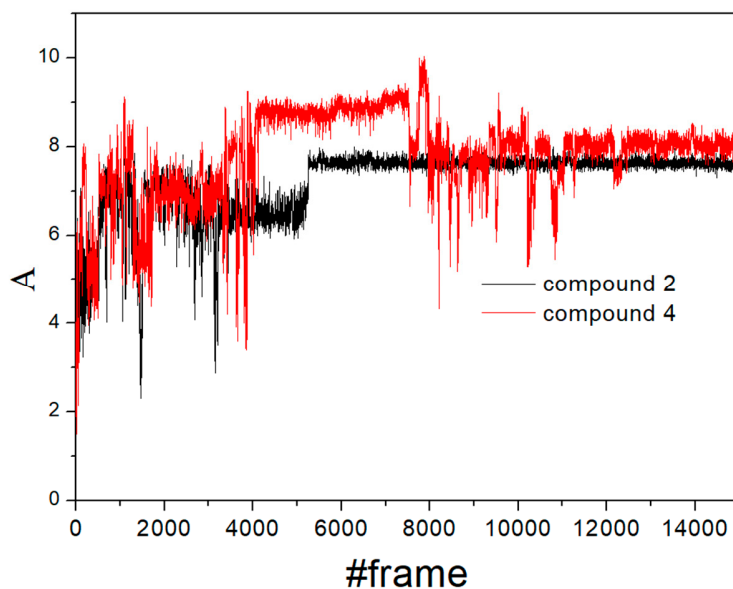

**Figure S12-** The central structures of the biggest cluster after Molecular Dynamic simulations of compounds 2 (left) and 4 (right). Carbon atoms of compounds 2 and 4 are colored in green and blue respectively.

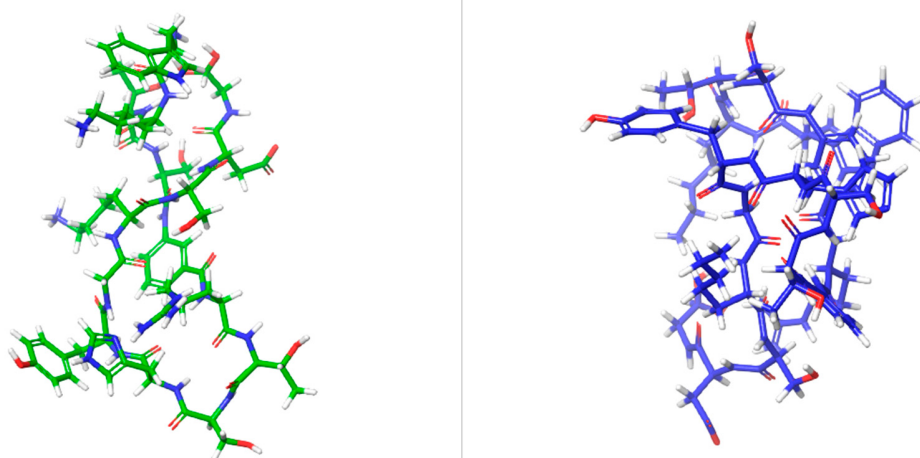

Supplement: s1 [file s1 › pharmaceuticals-2978600-supplementary.pdf]
